# Supplementary material for: Socioeconomic inequalities in health and the use of healthcare services in Catalonia: analysis of the individual data of 7.5 million residents
Source: PubMed Central journal article supplement — J Epidemiol Community Health. 2018 Aug 6;72(10):871–9. doi: 10.1136/jech-2018-210817 (PMC6161657; doi:10.1136/jech-2018-210817), 2018-08-06
Supplement: jech-2018-210817supp001.pdf [file jech-2018-210817supp001.pdf]

## **Supplemental Annex 1. Definition of the various allowances and benefits.**

*Unemployment benefit:* contributory benefit that protects people who are able and willing to work but who have lost their jobs temporarily or permanently or who have temporarily reduced their normal working hours.

*Unemployment allowance:* assistance that protects people who have lost their jobs and are not entitled to unemployment benefits, or whose benefits have expired.

*Active insertion income, or jobseeker's allowance (RAI):* assistance provided to long-term unemployed over the age of 45, people with a degree of disability above 33% whose unemployment benefit or allowance has expired and are in the process of seeking a job, emigrants over the age of 45 returning to Spain, and victims of gender violence.

*Minimum insertion income, or guaranteed minimum income (RMI):* universal benefit for residents of Catalonia with serious economic and social difficulties and who are unable to meet basic needs; it provides maintenance and helps with reintegration in the workplace and in society.

*Mutual insurance for civil servants:* civil servants may opt for mutual insurance to cover their healthcare instead of the public healthcare services.

*Contributory pensions:* pensions granted to retirees who have made the required number of Social Security payments. Normally of indefinite duration, these pensions include: retirement (including early retirements), permanent disability (total, absolute and large-scale disability) and widows', orphans' or relatives' pensions.

*Non-contributory pensions:* pensions granted to persons in need of protection and who do not have sufficient resources for subsistence in accordance with the legal terms established, even though they have never made Social Security contributions or for the necessary time to qualify for a contributory pension. These pensions may include disability and retirement pensions.
