# Supplementary material for: Socioeconomic inequalities in health and the use of healthcare services in Catalonia: analysis of the individual data of 7.5 million residents
Source: PubMed Central journal article supplement — J Epidemiol Community Health. 2018 Aug 6;72(10):871–9. doi: 10.1136/jech-2018-210817 (PMC6161657; doi:10.1136/jech-2018-210817), 2018-08-06
Supplement: jech-2018-210817supp002.pdf [file jech-2018-210817supp002.pdf]

**Supplemental Table 1. Population included according to socio-economic level, sex and age group. Catalonia, 2015**

| Sex        | Age         | Unemployment allowance expired, RMI/RAI | Unemployment allowance | Unemployment benefit expired | Unemployment benefit | Income from employment 18,000€ | Income from employment 18,000€ to 100,000€ | Income above 100,000€ | Non-contributory pension | Pensioner income <18,000€ | Pensioner income 18,00€ to 100,000€ | Pensioner income >100,000€ | Not specified | Total population included in the study | Total population | % inclusion in the study |
|------------|-------------|-----------------------------------------|------------------------|------------------------------|----------------------|--------------------------------|--------------------------------------------|-----------------------|--------------------------|---------------------------|-------------------------------------|----------------------------|---------------|----------------------------------------|------------------|--------------------------|
| Female     | 0-4 years   | 7,515                                   | 6,547                  | 4,231                        | 7,510                | 42,618                         | 30,894                                     | 924                   | 267                      | 2,767                     | 598                                 | 6                          | 77,761        | 100,239                                | 181,638          | 55.20%                   |
|            | 5-9 years   | 10,994                                  | 7,271                  | 4,946                        | 7,393                | 71,282                         | 61,467                                     | 1,826                 | 436                      | 5,319                     | 1,220                               | 8                          | 33,423        | 165,179                                | 205,585          | 80.30%                   |
|            | 10-14 years | 8,687                                   | 5,901                  | 3,513                        | 5,730                | 57,629                         | 57,144                                     | 2,208                 | 565                      | 8,196                     | 1,875                               | 39                         | 35,487        | 140,812                                | 186,974          | 75.30%                   |
|            | 15-19 years | 6,979                                   | 5,283                  | 2,313                        | 4,643                | 53,649                         | 48,060                                     | 2,317                 | 578                      | 10,236                    | 2,040                               | 54                         | 30,750        | 123,244                                | 166,902          | 73.80%                   |
|            | 20-24 years | 4,445                                   | 3,957                  | 2,694                        | 4,501                | 82,110                         | 16,746                                     | 997                   | 388                      | 9,251                     | 1,299                               | 41                         | 46,216        | 115,450                                | 172,645          | 66.90%                   |
|            | 25-29 years | 6,037                                   | 4,765                  | 6,420                        | 8,722                | 105,116                        | 19,168                                     | 128                   | 435                      | 1,313                     | 331                                 | 13                         | 56,587        | 150,356                                | 209,035          | 71.90%                   |
|            | 30-34 years | 8,885                                   | 6,753                  | 9,988                        | 12,218               | 114,194                        | 53,209                                     | 216                   | 650                      | 2,211                     | 343                                 | 8                          | 62,345        | 205,463                                | 271,020          | 75.80%                   |
|            | 35-39 years | 11,054                                  | 8,224                  | 12,172                       | 13,584               | 132,036                        | 82,752                                     | 732                   | 1,062                    | 4,493                     | 1,086                               | 17                         | 61,083        | 260,554                                | 328,295          | 79.40%                   |
|            | 40-44 years | 10,910                                  | 7,335                  | 11,499                       | 11,517               | 123,721                        | 83,324                                     | 1,639                 | 1,553                    | 7,401                     | 2,001                               | 37                         | 53,121        | 249,945                                | 314,058          | 79.60%                   |
|            | 45-49 years | 14,096                                  | 6,504                  | 7,573                        | 9,791                | 108,263                        | 77,462                                     | 2,131                 | 2,127                    | 10,901                    | 3,371                               | 57                         | 44,140        | 225,820                                | 286,416          | 78.80%                   |
|            | 50-54 years | 15,131                                  | 6,291                  | 6,087                        | 8,390                | 92,656                         | 69,640                                     | 2,182                 | 2,322                    | 16,904                    | 6,007                               | 91                         | 37,259        | 200,377                                | 262,960          | 76.20%                   |
|            | 55-59 years | 9,480                                   | 20,840                 | 4,583                        | 7,382                | 66,256                         | 57,682                                     | 1,815                 | 2,084                    | 27,384                    | 10,959                              | 221                        | 28,913        | 208,686                                | 237,599          | 87.80%                   |
|            | 60-64 years | 6,118                                   | 13,198                 | 2,736                        | 5,613                | 36,706                         | 30,673                                     | 1,154                 | 2,187                    | 58,756                    | 30,448                              | 486                        | 19,998        | 188,075                                | 208,073          | 90.40%                   |
|            | 65-69 years | 1,839                                   | 211                    | 519                          | 399                  | 4,956                          | 7,811                                      | 384                   | 4,892                    | 119,562                   | 50,094                              | 760                        | 8,553         | 175,308                                | 199,980          | 87.70%                   |
|            | 70-74 years | 870                                     | 44                     | 87                           | 74                   | 1,031                          | 3,884                                      | 176                   | 5,161                    | 115,859                   | 32,928                              | 587                        | 4,558         | 154,535                                | 165,259          | 93.50%                   |
|            | 75-79 years | 694                                     | 19                     | 19                           | 31                   | 415                            | 2,302                                      | 73                    | 4,709                    | 102,844                   | 20,091                              | 399                        | 2,997         | 128,043                                | 134,593          | 95.10%                   |
|            | 80-84 years | 587                                     | 18                     | 4                            | 14                   | 163                            | 1,951                                      | 45                    | 3,989                    | 108,221                   | 17,162                              | 356                        | 2,243         | 129,728                                | 134,753          | 96.30%                   |
| 85 years + | 453         | 8                                       | 1                      | 13                           | 112                  | 2,529                          | 39                                         | 2,899                 | 122,079                  | 14,519                    | 359                                 | 2,106                      | 139,856       | 145,117                                | 96.40%           |                          |
| Male       | 0-4 years   | 8,033                                   | 6,989                  | 4,393                        | 7,954                | 45,314                         | 33,107                                     | 939                   | 334                      | 2,872                     | 630                                 | 8                          | 82,516        | 106,729                                | 193,089          | 55.30%                   |
|            | 5-9 years   | 11,594                                  | 7,544                  | 5,328                        | 7,833                | 76,021                         | 65,780                                     | 1,888                 | 478                      | 5,587                     | 1,281                               | 19                         | 35,397        | 175,988                                | 218,750          | 80.50%                   |

|                    |                |                |                |                |                  |                  |               |               |                  |                |              |                  |                  |                  |               |
|--------------------|----------------|----------------|----------------|----------------|------------------|------------------|---------------|---------------|------------------|----------------|--------------|------------------|------------------|------------------|---------------|
| <b>10-14 years</b> | 9,076          | 6,278          | 3,836          | 6,245          | 61,493           | 59,428           | 2,395         | 636           | 8,654            | 1,911          | 42           | 37,430           | <b>148,751</b>   | <b>197,424</b>   | <b>75.30%</b> |
| <b>15-19 years</b> | 7,644          | 5,816          | 2,555          | 5,076          | 57,301           | 51,257           | 2,394         | 605           | 11,022           | 2,178          | 54           | 33,487           | <b>132,043</b>   | <b>179,389</b>   | <b>73.60%</b> |
| <b>20-24 years</b> | 4,788          | 3,936          | 3,163          | 4,627          | 82,439           | 20,187           | 1,086         | 571           | 10,190           | 1,435          | 43           | 48,428           | <b>120,226</b>   | <b>180,893</b>   | <b>66.50%</b> |
| <b>25-29 years</b> | 3,926          | 3,160          | 7,107          | 7,869          | 102,910          | 22,346           | 200           | 586           | 1,826            | 437            | 15           | 54,920           | <b>147,518</b>   | <b>205,302</b>   | <b>71.90%</b> |
| <b>30-34 years</b> | 6,327          | 5,358          | 9,986          | 11,135         | 112,365          | 61,692           | 294           | 916           | 2,835            | 464            | 5            | 61,346           | <b>207,157</b>   | <b>272,723</b>   | <b>76.00%</b> |
| <b>35-39 years</b> | 8,970          | 7,662          | 11,873         | 13,303         | 127,400          | 107,006          | 1,191         | 1,445         | 5,902            | 1,064          | 9            | 62,563           | <b>277,405</b>   | <b>348,388</b>   | <b>79.60%</b> |
| <b>40-44 years</b> | 10,173         | 7,904          | 10,505         | 11,756         | 114,530          | 115,464          | 2,998         | 1,849         | 8,966            | 1,828          | 20           | 51,346           | <b>273,330</b>   | <b>337,339</b>   | <b>81.00%</b> |
| <b>45-49 years</b> | 15,317         | 8,373          | 6,268          | 10,342         | 92,830           | 107,626          | 4,175         | 1,966         | 11,909           | 2,393          | 41           | 37,904           | <b>244,931</b>   | <b>299,144</b>   | <b>81.90%</b> |
| <b>50-54 years</b> | 14,700         | 8,077          | 4,535          | 8,913          | 77,648           | 93,849           | 4,765         | 1,887         | 15,288           | 3,338          | 79           | 28,602           | <b>212,487</b>   | <b>261,681</b>   | <b>81.20%</b> |
| <b>55-59 years</b> | 6,832          | 19,001         | 3,794          | 9,020          | 57,756           | 78,925           | 4,443         | 1,341         | 19,526           | 5,355          | 107          | 20,705           | <b>206,100</b>   | <b>226,805</b>   | <b>90.90%</b> |
| <b>60-64 years</b> | 3,938          | 9,313          | 2,151          | 7,332          | 34,643           | 42,282           | 3,086         | 1,087         | 47,326           | 28,495         | 649          | 12,740           | <b>180,302</b>   | <b>193,042</b>   | <b>93.40%</b> |
| <b>65-69 years</b> | 724            | 176            | 294            | 206            | 3,425            | 7,000            | 845           | 2,177         | 86,574           | 70,900         | 1,653        | 4,794            | <b>161,304</b>   | <b>178,768</b>   | <b>90.20%</b> |
| <b>70-74 years</b> | 282            | 31             | 49             | 35             | 716              | 3,321            | 321           | 1,816         | 79,447           | 51,892         | 985          | 2,390            | <b>134,140</b>   | <b>141,285</b>   | <b>94.90%</b> |
| <b>75-79 years</b> | 168            | 12             | 6              | 15             | 225              | 1,727            | 110           | 1,310         | 69,300           | 28,057         | 505          | 1,329            | <b>99,172</b>    | <b>102,764</b>   | <b>96.50%</b> |
| <b>80-84 years</b> | 108            | 6              | 4              | 3              | 93               | 1,203            | 73            | 923           | 62,832           | 21,868         | 475          | 774              | <b>86,098</b>    | <b>88,362</b>    | <b>97.40%</b> |
| <b>85 years +</b>  | 84             | 3              | 2              | 3              | 46               | 1,166            | 28            | 575           | 50,888           | 14,080         | 325          | 522              | <b>65,868</b>    | <b>67,722</b>    | <b>97.30%</b> |
| <b>Total</b>       | <b>237,458</b> | <b>202,808</b> | <b>155,234</b> | <b>219,192</b> | <b>2,140,068</b> | <b>1,580,064</b> | <b>50,217</b> | <b>56,806</b> | <b>1,234,641</b> | <b>433,978</b> | <b>8,573</b> | <b>1,184,733</b> | <b>6,041,219</b> | <b>7,503,772</b> | <b>80.50%</b> |

**Supplemental Table 2. Results of indicators for persons receiving benefit/subsidies between 55 and 64 years, divided according to sex and socio-economic level. Catalonia, 2015**

|                                                   | Non-contributory pension |       | Pension <18,000€ |       | Pension 18,000€ a 100,000€ |       | Pension >100,000€ |      | Max/Min |      |
|---------------------------------------------------|--------------------------|-------|------------------|-------|----------------------------|-------|-------------------|------|---------|------|
|                                                   | Female                   | Male  | Female           | Male  | Female                     | Male  | Female            | Male | Female  | Male |
| Persons receiving benefits aged 55 to 64 years    |                          |       |                  |       |                            |       |                   |      |         |      |
| Mortality rate (per 1,000 inh.)                   | 15.3                     | 38.2  | 5.4              | 16.4  | 3.3                        | 7.3   | -                 | -    | 4.7     | 5.2  |
| Persons with high morbidity (%)                   | 24.6                     | 29.7  | 7.8              | 16.1  | 3.9                        | 6.8   | 2.3               | 4.9  | 10.7    | 6.1  |
| Persons seen at primary care (%)                  | 92.4                     | 85.5  | 90.8             | 89.4  | 86.2                       | 86.9  | 69.8              | 75.2 | 1.3     | 1.2  |
| Mean primary care visits                          | 15.4                     | 13.0  | 10               | 10.5  | 7.8                        | 8.0   | 5.4               | 5.9  | 2.8     | 2.2  |
| Persons seen at emergency care (%)                | 48.6                     | 44.9  | 32.3             | 33.1  | 25.0                       | 25.0  | 14.4              | 19.1 | 3.4     | 2.3  |
| Mean emergency care visits                        | 4.1                      | 4.9   | 2.2              | 2.6   | 1.9                        | 2.0   | 1.9               | 2.0  | 2.1     | 2.5  |
| Persons seen at mental health centres (%)         | 26.5                     | 19.1  | 9.2              | 8.1   | 4.9                        | 2.6   | 1.6               | 1.5  | 16.6    | 12.5 |
| Mean mental health centre visits                  | 8.5                      | 10.9  | 6.5              | 7.9   | 6.1                        | 5.6   | 4.3               | 6.9  | 2.0     | 1.9  |
| Hospitalization rate (per 1,000 inh.)             | 280.7                    | 380.3 | 154.3            | 250.2 | 102                        | 152.4 | 57.3              | 96.5 | 4.9     | 3.9  |
| Preventable hospitalization rate (per 1,000 inh.) | 44.6                     | 81.2  | 9.5              | 23.8  | 4.0                        | 8.4   | 1.3               | 3.3  | 34.8    | 24.3 |
| Surgical hospitalization rate (per 1,000 inh.)    | 119.3                    | 119   | 100.2            | 126.9 | 71.5                       | 92.1  | 25.4              | 52.6 | 4.7     | 2.4  |
| Psychiatric hospitalization rate (per 1,000 inh.) | 41.8                     | 45.1  | 7.5              | 11.0  | 2.4                        | 2.0   | 0.0               | 1.4  | -       | 31.9 |
| Persons consuming medication (%)                  | 93.7                     | 86.7  | 89.6             | 88.2  | 84.8                       | 84.7  | 67.5              | 75.7 | 1.4     | 1.2  |
| Mean nº of prescriptions                          | 92.4                     | 79.1  | 47.6             | 55.2  | 35.5                       | 38.0  | 29.1              | 37.7 | 3.2     | 2.1  |
| Persons consuming psychoactive drugs (%)          | 72.1                     | 57.2  | 51.2             | 34.7  | 42.3                       | 23.4  | 35.7              | 21.3 | 2.0     | 2.7  |
| Persons consuming anxiolytics (%)                 | 54.3                     | 40.6  | 40.0             | 25.7  | 33.4                       | 18.2  | 29.1              | 17.4 | 1.9     | 2.3  |
| Persons consuming antidepressants (%)             | 46.7                     | 24.1  | 31.5             | 16.8  | 24.4                       | 10.0  | 18.9              | 9.4  | 2.5     | 2.6  |
| Persons consuming antipsychotics (%)              | 27.8                     | 29.4  | 7.5              | 9.0   | 4.0                        | 2.8   | 3.4               | 1.8  | 8.2     | 16.0 |

**Supplemental Table 3. Results of indicators in the active population aged between 55 and 64 years, divided according to sex and socio-economic level. Catalonia, 2015**

|                                                          | Unemployment allowance expired, RMI/RAI |       | Unemployment allowance |       | Unemployment benefit expired |      | Unemployment benefit |       | Income <18,000€ |       | Income 18,000€ a 100,000€ |      | Income >100,000€ |      | Max/Min |      |
|----------------------------------------------------------|-----------------------------------------|-------|------------------------|-------|------------------------------|------|----------------------|-------|-----------------|-------|---------------------------|------|------------------|------|---------|------|
|                                                          | Female                                  | Male  | Female                 | Male  | Female                       | Male | Female               | Male  | Female          | Male  | Female                    | Male | Female           | Male | Female  | Male |
| <b>People in employment aged 55 to 64 years</b>          |                                         |       |                        |       |                              |      |                      |       |                 |       |                           |      |                  |      |         |      |
| <b>Mortality rate (per 1,000 inh.)</b>                   | 3.4                                     | 9.5   | 1.9                    | 6.6   | 2.1                          | 6.6  | 1.2                  | 4.2   | 1.5             | 3.4   | 1.5                       | 2.9  | -                | -    | 2.7     | 3.3  |
| <b>Persons high morbidity (%)</b>                        | 5.9                                     | 7.4   | 2.8                    | 5.1   | 3.0                          | 3.4  | 1.9                  | 3.2   | 2.0             | 3.3   | 1.2                       | 2.3  | 0.8              | 1.2  | 7       | 6.4  |
| <b>Persons seen at primary care (%)</b>                  | 89.2                                    | 78.3  | 89.7                   | 81.6  | 80                           | 65.7 | 85.7                 | 81.9  | 86.2            | 79.1  | 68                        | 70.4 | 54.5             | 48.4 | 1.6     | 1.7  |
| <b>Mean primary care visits</b>                          | 10.0                                    | 9.3   | 8.1                    | 8.2   | 8.1                          | 7.3  | 7.8                  | 7.5   | 8.3             | 7.8   | 6.7                       | 6.8  | 4.7              | 4.4  | 2.1     | 2.1  |
| <b>Persons seen at emergency care (%)</b>                | 33.7                                    | 31.1  | 27.2                   | 27.2  | 24.3                         | 19   | 23.9                 | 22.8  | 25.8            | 24.5  | 18                        | 19.1 | 11.2             | 10.7 | 3.0     | 2.9  |
| <b>Mean emergency care visits</b>                        | 2.3                                     | 2.5   | 1.9                    | 2.1   | 1.9                          | 2.0  | 1.9                  | 1.9   | 1.8             | 1.9   | 1.7                       | 1.8  | 1.8              | 1.6  | 1.4     | 1.6  |
| <b>Persons seen at mental health centres (%)</b>         | 6.3                                     | 3.3   | 3.7                    | 2.2   | 4.0                          | 1.7  | 3.4                  | 2.0   | 2.8             | 1.4   | 1.8                       | 1.1  | 0.7              | 0.4  | 8.5     | 8.3  |
| <b>Mean mental health centre visits</b>                  | 5.5                                     | 6.8   | 5.3                    | 5.2   | 4.7                          | 5.9  | 5.0                  | 4.9   | 5.1             | 4.9   | 5.7                       | 5    | 8.3              | 3.8  | 1.8     | 1.8  |
| <b>Hospitalization rate (per 1,000 inh.)</b>             | 124.6                                   | 158.7 | 100.6                  | 141.1 | 85.7                         | 98.5 | 86.9                 | 113.1 | 89.0            | 113.4 | 60.2                      | 89.7 | 33.1             | 48.9 | 3.8     | 3.2  |
| <b>Preventable hospitalization rate (per 1,000 inh.)</b> | 7.7                                     | 12.7  | 3.6                    | 8.7   | 2.9                          | 4.4  | 2.9                  | 3.8   | 3.2             | 5.3   | 1.8                       | 3.5  | 0.7              | 1.1  | 10.9    | 11.6 |
| <b>Surgical hospitalization rate (per 1,000 inh.)</b>    | 78.2                                    | 83.4  | 73.9                   | 83.0  | 60.1                         | 58.8 | 63.7                 | 74.0  | 67.0            | 72.4  | 45.2                      | 58.8 | 21               | 29.7 | 3.7     | 2.8  |
| <b>Psychiatric hospitalization rate (per 1,000 inh.)</b> | 3.5                                     | 4.7   | 2.1                    | 2.9   | 1.2                          | 2.0  | 1.4                  | 2.6   | 1.2             | 0.9   | 0.9                       | 0.5  | 0.3              | 0.1  | 10.7    | 36.1 |
| <b>Persons consuming medication (%)</b>                  | 87.2                                    | 74.9  | 86.9                   | 77.3  | 76.6                         | 61.6 | 82.6                 | 77.8  | 82.0            | 74.7  | 61.1                      | 65.4 | 57.5             | 52.4 | 1.5     | 1.5  |
| <b>Mean n° of prescriptions</b>                          | 43.9                                    | 37    | 29.4                   | 30.0  | 29.3                         | 28.3 | 26.1                 | 27.9  | 24.8            | 26.7  | 22.2                      | 26.4 | 22.0             | 26.8 | 2.0     | 1.4  |
| <b>Persons consuming psychoactive drugs (%)</b>          | 46.3                                    | 23.3  | 40.3                   | 19.6  | 34.5                         | 15.3 | 35.4                 | 17.7  | 34.3            | 16.8  | 24.9                      | 15.2 | 25.6             | 13.9 | 1.9     | 1.7  |
| <b>Persons consuming anxiolytics (%)</b>                 | 36.8                                    | 18.1  | 31.5                   | 15.4  | 27.0                         | 11.9 | 27.4                 | 13.9  | 26.7            | 13.2  | 19.5                      | 12.0 | 20.6             | 11.6 | 1.9     | 1.6  |
| <b>Persons consuming antidepressants (%)</b>             | 27.5                                    | 9.9   | 22.6                   | 8.1   | 19.7                         | 6.9  | 19.4                 | 7.3   | 18.1            | 6.6   | 12.7                      | 6.0  | 12.5             | 5.2  | 2.2     | 1.9  |
| <b>Persons consuming antipsychotics (%)</b>              | 4.8                                     | 3.4   | 2.7                    | 2.0   | 2.9                          | 1.5  | 2.3                  | 1.6   | 2.3             | 1.5   | 1.4                       | 1.1  | 1.6              | 0.6  | 3.4     | 5.3  |
